# Supplementary material for: Ultrahigh thermoelectric performance of Janus α-STe2 and α-SeTe2 monolayers
Source: Royal Society of Chemistry journal article supplement (doi:10.1039/d2cp03659b), 2022-01-01
Supplement: d2cp03659b1.pdf [file d2cp03659b1.pdf]

## Ultra-high thermoelectric performance of Janus $\alpha$ -STe<sub>2</sub> and SeTe<sub>2</sub> monolayers

Gang Liu<sup>1\*</sup>, Aiqing Guo<sup>1</sup>, Fengli Cao<sup>1</sup>, Weiwei Ju<sup>1</sup>, Zhaowu Wang<sup>1</sup>, Hui Wang<sup>1</sup>,  
Guo-Ling Li<sup>2</sup>, Zhibin Gao<sup>3\*</sup>

<sup>1</sup>School of Physics and Engineering, Henan University of Science and Technology,  
Luoyang 471023, People's Republic of China

<sup>2</sup>Chemistry and Chemical Engineering Guangdong Laboratory, Shantou 515063, People's  
Republic of China

<sup>3</sup>State Key Laboratory for Mechanical Behavior of Materials, Xi'an Jiaotong University, Xi'an  
710049, People's Republic of China.

Email: [liugang8105@haust.edu.cn](mailto:liugang8105@haust.edu.cn); [zhibin.gao@xjtu.edu.cn](mailto:zhibin.gao@xjtu.edu.cn)

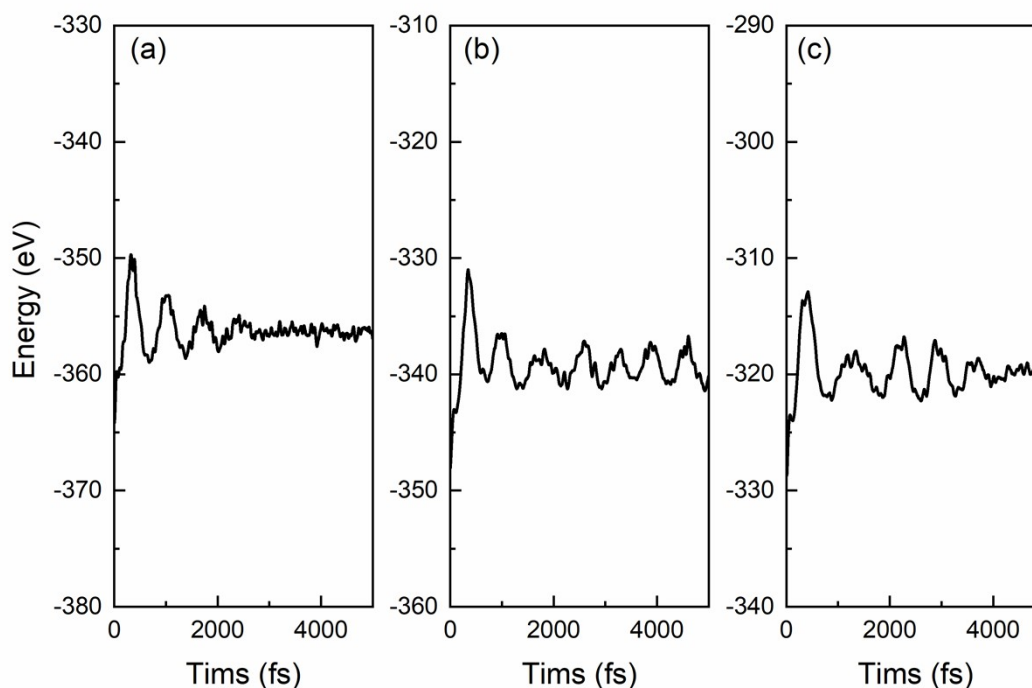

Fig. S1. AIMD simulation curves of energy with respect to time for (a)  $\alpha$ -STe<sub>2</sub>, (b)  $\alpha$ -SeTe<sub>2</sub> and (c)  $\alpha$ -Te monolayers at 500 K. The energy curves fluctuate, but the average energies remain nearly invariant, confirming the thermal stabilities of the three monolayers at 500 K.
